# Supplementary material for: The CARF Protein MM_0565 Affects Transcription of the Casposon-Encoded cas1-solo Gene in Methanosarcina mazei Gö1
Source: PubMed Central journal article supplement (PMC7465815; doi:10.3390/biom10081161), 2020-08-07
Supplement: biomolecules-10-01161-s001.pdf [file biomolecules-10-01161-s001.pdf]

## SUPPLEMENTARY MATERIALS

**Table S1.** Strains and plasmids.

| Strain or plasmid                  | Genotype or description                                                                         | Source or reference                        |
|------------------------------------|-------------------------------------------------------------------------------------------------|--------------------------------------------|
| <b>Strain</b>                      |                                                                                                 |                                            |
| <i>M. mazei</i> G61                | wild type                                                                                       | DSM No. 3647                               |
| <i>M. mazei</i> *                  | potential cell wall mutant                                                                      | [29]                                       |
| <i>E. coli</i> DH5a                | general cloning strain                                                                          | [30]                                       |
| <i>E. coli</i> JM109 λpir          | general cloning strain                                                                          | [31]                                       |
| <i>E. coli</i> BL21-CodonPlus®-RIL | general cloning strain, containing the pRIL plasmid ( <i>ileW</i> , <i>leuY</i> , <i>proL</i> ) | Stratagene, La Jolla, USA                  |
| <b>Plasmid</b>                     |                                                                                                 |                                            |
| pCR4-TOPO                          | general cloning vector                                                                          | Invitrogen, Darmstadt, GER                 |
| pET28a (+)                         | expression vector                                                                               | Novagene®, Merck Millipore, Darmstadt, GER |
| pWM321                             | general cloning vector                                                                          | [34]                                       |
| pRS924                             | pCR4-TOPO containing <i>MM_0565</i>                                                             | This study                                 |
| pRS923                             | pET28a containing <i>MM_0565</i>                                                                | This study                                 |
| pRS893                             | pDrive containing <i>pmcrB</i> + RBS                                                            | This study                                 |
| pRS1031                            | pDrive containing <i>pmcrB</i> + RBS with His-tagged <i>MM_0565</i>                             | This study                                 |
| pRS1032                            | pWM321 containing <i>pmcrB</i> + RBS with His-tagged <i>MM_0565</i>                             | This study                                 |

**Table S2.** Primer pairs used for cloning and RT-PCR. Attached cleavage sites of restriction enzymes are underlined.

| <b>Primer designations</b>       | <b>5'→3'</b>                                                               |
|----------------------------------|----------------------------------------------------------------------------|
| <b>Mutant construction</b>       |                                                                            |
| MM565_NheI_for                   | <u>GCTAGCAT</u> GTCAAAGCTTACACTCAT                                         |
| MM565_BamHI_rev                  | <u>GGATCC</u> TAAATGGAAGCAATTCTTC                                          |
| <b>5'RACE analysis</b>           |                                                                            |
| 5RACE_MM0565_outer               | CGGTGTCATAAAGAGCAGTA                                                       |
| 5RACE_MM0565_inner               | CTTCAAGCGCGTTTTTGAAGG                                                      |
| MM0565_specific                  | GCTTACACTCATCTCCACCA                                                       |
| <b>RT-PCR analysis</b>           |                                                                            |
| qRT_MM1215_for                   | TCAAGAGCGAGGGCATGAATG                                                      |
| qRT_MM1215_rev                   | GCACTACCGAGAACAATAGCC                                                      |
| qRT_MM1621_for                   | TAGGAGGTTTTCTCGGAAGCG                                                      |
| qRT_MM1621_for                   | AAGCGTATCTCCATCAAGCCC                                                      |
| qRT_MM2181_for                   | GCCTCCATGAGAAGAATGCTC                                                      |
| qRT_MM2181_for                   | CTTCAAGGTCTCCAACCTCTG                                                      |
| qRT_MM3249_for                   | CAACTACAGAAGAGCCTCAAG                                                      |
| qRT_MM3249_rev                   | GGAGGAAGCATAGTAGTTAGAAGC                                                   |
| qRT_crRNA_for                    | AGGGTTTGATAATTTTCCAG                                                       |
| qRT_crRNA_rev                    | AAAAGCGGTGTTAAGTCAG                                                        |
| qRT_MM565_for                    | CCTGTTATTATCTGTGTGACGC                                                     |
| qRT_MM565_rev                    | ATGACCTGGTTGCCTCTATC                                                       |
| qRT_MM564_for                    | ATTTTTGATGTGTTGTATGG                                                       |
| qRT_MM564_rev                    | TTTGTTGAAGAAGTTTTTG                                                        |
| qRT_MM563_for                    | GGGGAAGGAAAAAGTCAGTC                                                       |
| qRT_MM563_rev                    | CATTAATTAGTGCTGCGGTG                                                       |
| qRT_MM562_for                    | GACTGCTTGGTTTTTAGGG                                                        |
| qRT_MM562_rev                    | GGAGAAAGCACTTGAATACC                                                       |
| qRT_MM561_for                    | TGTATGGCACATGACTTTGG                                                       |
| qRT_MM561_rev                    | ACGGGCATCTTTTACTTTC                                                        |
| qRT_MM560_for                    | CGGATTAGACGAAGGTTCAA                                                       |
| qRT_MM560_rev                    | TAAAGCGAGCCAAGGAGTT                                                        |
| qRT_MM559_for                    | AATGGCAGAAGCAGAAACC                                                        |
| qRT_MM559_rev                    | AAACCGTCCTGTCAATGTG                                                        |
| qRT_MM558_for                    | GGGCTTTACAGGGTTCAGA                                                        |
| qRT_MM558_rev                    | ATTATCTCGTCGCTGACAAG                                                       |
| qRT_MM557_for                    | AGCAACAGCCTGGTCAAAG                                                        |
| qRT_MM557_rev                    | TCCGGTAACAGCAATCTACG                                                       |
| <b>EMSA</b>                      |                                                                            |
| Leader_IB_for                    | AGAAAATGCGTAGATTGCTGTTAC                                                   |
| Leader_IIC_for                   | GTTTCCAAACCACTAAAAAAC                                                      |
| KonsLeader_rev                   | AGGGCAAAAATTTCCGTTATTTG                                                    |
| <b>Microscale thermophoresis</b> |                                                                            |
| Thermo_MM3250_neu_for            | CCGCTCTTACTTATGTACAGAATTGAGTATAACTTTAAG<br>TATAAGTTTGATGTATATTTTGTATATAATT |
| Thermo_MM3250_neu_rev            | AATTATATACAAAATATACATCAAACCTTACTTAAAGT<br>TATACTCAATTCTGTACATAAGTAAGAGCGG  |
| Thermo_Prom_MM0565_1_for         | AACTAAATCCCTATATCGTAAAACATTTAACCAAACCT<br>ACAATACATGACATCTAATGT            |

|                          |                                                                              |
|--------------------------|------------------------------------------------------------------------------|
| Thermo_Prom_MM0565_1_rev | ACATTAGATGTCATGTATTGTAGGGTTTGGTTAAATGTTT<br>TACGATATAGGGATTTAGTT             |
| Thermo_Prom_MM0565_2_for | AGCAAATAGAACCAAACATCAAACATTTAACCAAACCC<br>TACAATACATGACATCTAATGT             |
| Thermo_Prom_MM0565_2_rev | ACATTAGATGTCATGTATTGTAGGGTTTGGTTAAATGTTT<br>GATGTTTGGTTCTATTTGCT             |
| Thermo_Prom_MM0565_3_for | AGCAAATAGAACCAAACATCAAACAAATCCCTATATCG<br>TACAATACATGACATCTAATGT             |
| Thermo_Prom_MM0565_3_rev | ACATTAGATGTCATGTATTGTACGATATAGGGATTTAGT<br>TGATGTTTGGTTCTATTTGCT             |
| Thermo_Prom_MM0565_4_for | AGCAAATAGAACCAAACATCAAACAAATCCCTATATCG<br>TAAACATTTAACCAAACCCTA              |
| Thermo_Prom_MM0565_4_rev | TAGGGTTTGGTTAAATGTTTTACGATATAGGGATTTAGTT<br>GATGTTTGGTTCTATTTGCT             |
| Thermo_Prom_Cas8b_for    | TCTATTTGCTTATTTTTATAATTATTTTTAGAAATGTATAT<br>ATAATATGTTAACTATGAACCTTGATGGT   |
| Thermo_Prom_Cas8b_rev    | ACCATCAAGGTTTCATAGTTAACATATTATATATACATTT<br>CTAAAAATAATTATAAAAAATAAGCAAATAGA |
| Thermo_Prom_MM3360_for   | AAAGATAACTGATGAAATGCGAGAAAATTCGTGAGCA<br>AGATCCACTAAAACAAGGATTGAAGATAAACTG   |
| Thermo_Prom_MM3360_rev   | CAGTTTATCTTCAATCCTTGTTTTAGTGGATCTTGCTCAC<br>GAATTTTCTCGCATTTTCATCAGTTATCTTT  |
| Thermo_kons_Leader_for   | TTTTTCTTGATTTATAAAGGGTTTGATAATTTTCCAGCA<br>AGAATTTTAGCCCCAAAAAAGGGCTCATT     |
| Thermo_kons_leader_rev   | AAATGAGCCCTTTTTTGGGGCTAAAATTCTTGCTGGAAA<br>ATTATCAAACCCTTTATAAATACAAGAAAAA   |

---

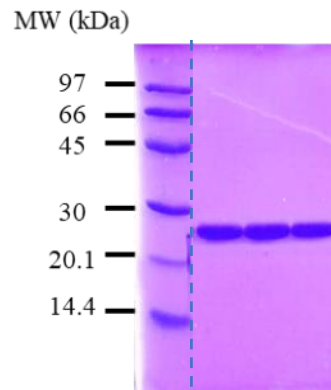

**Figure S1.** Purification of His<sub>6</sub>-MM\_0565. His<sub>6</sub>-MM\_0565 was heterologously expressed in *E. coli* BL21-CodonPlus®-RIL and purified via Nickel-NTA affinity chromatography. The separation of the samples was performed on a denaturing SDS gel (12%).

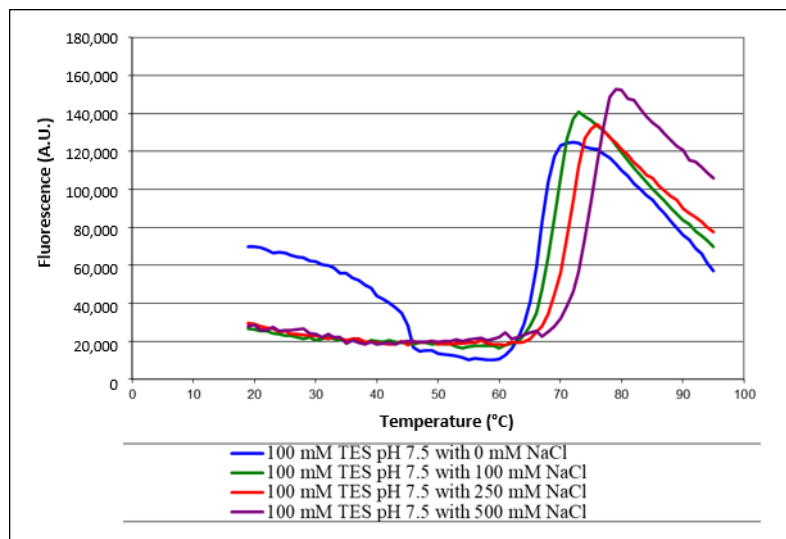

**Figure S2:** Stabilization of His<sub>6</sub>-MM\_0565 in buffers with higher salt concentrations. Melting curves of His<sub>6</sub>-MM\_0565 in 100 mM TES buffer (pH 7.5) with increasing concentrations of sodium chloride (0, 100, 250 and 500 mM NaCl). Refolding was monitored with fluorescently labeled protein (with SYPRO) in a temperature gradient between 19 and 95 °C (see Material and Methods in the main manuscript).

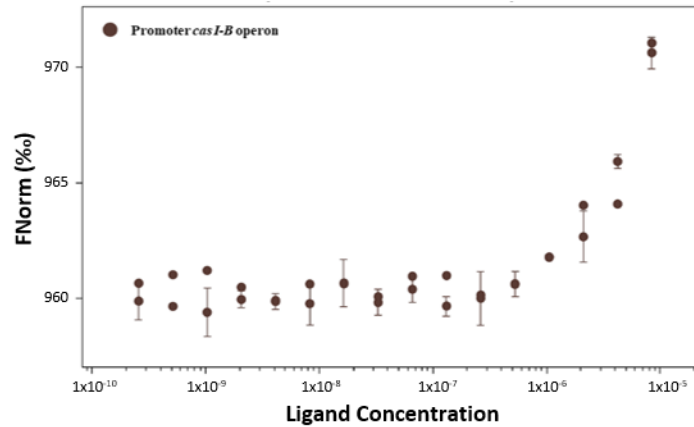

**Figure S3:** Interaction analysis between purified His<sub>6</sub>-MM\_0565 and the promoter region of the *cas I-B* operon (*cas8b*) by microscale thermophoresis (MST). The interaction between the fluorescent-labeled protein His<sub>6</sub>-MM\_0565 and the promoter region of the *cas I-B* operon (*cas8b*) was measured using the Monolith NT.115 from NanoTemper (Munich, GER) in three independent replicates and evaluated using the corresponding MO Affinity Analysis Software (see the Material and Methods in the main manuscript).  $K_D$  values were not calculated due to the fact of no clear binding of MM\_0565 to the respective DNA fragments.

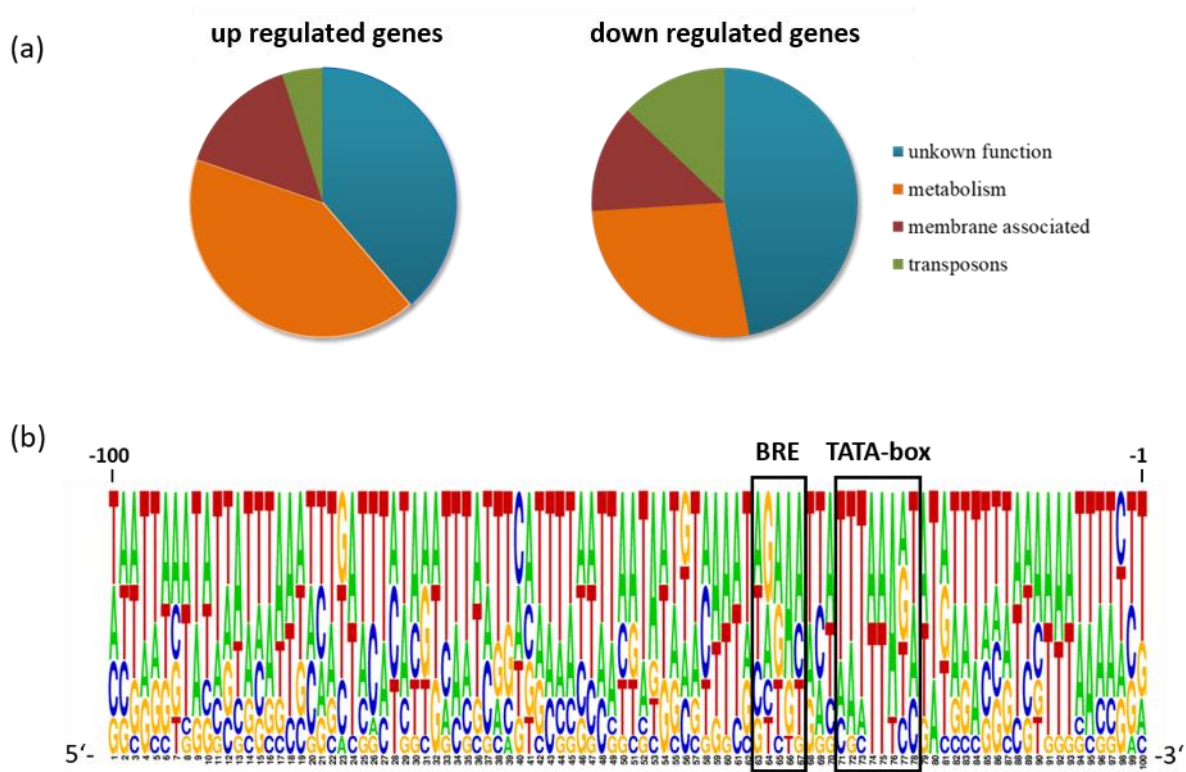

**Figure S4:** Impact of the overproduction mutant of MM\_0565 in *M. mazei* G61. (a) Classification of the up- (left diagram) and down- (right diagram)-regulated genes from the RNAseq data (Table 1, in the main manuscript) according to their function. (b) Comparison of promoter regions from genes with an enhanced transcript level in the MM\_0565 overproduction mutant. Frequency blot of 100 nucleotides upstream of the transcriptional start sites (TSS) from 14 genes which showed a significantly enhanced transcript level in the *M. mazei* MM\_0565 overproduction mutant (see Table 1, in the main manuscript)

using Weblogo [60]. All promotor regions from genes with a distinct TSS in the RNAseq data were used. Putative TATA-boxes and B recognition elements (BRE) are indicated with black boxes.

29. Ehlers, C., et al., *Development of genetic methods and construction of a chromosomal glnK(1) mutant in Methanosarcina mazei strain Gö1*. Mol Genet Genomics, 2005. **273**: p. 290-298.
30. Hanahan, D., *Studies on transformation of Escherichia coli with plasmids*. J Mol Biol, 1983. **166**(4): p. 557-80.
31. Miller, V.L. and J.J. Mekalanos, *A novel suicide vector and its use in construction of insertion mutations: osmoregulation of outer membrane proteins and virulence determinants in Vibrio cholerae requires toxR*. J Bacteriol, 1988. **170**(6): p. 2575-83.
34. Metcalf, W.W., et al., *A genetic system for Archaea of the genus Methanosarcina: liposome-mediated transformation and construction of shuttle vectors*. Proc Natl Acad Sci U S A, 1997. **94**(6): p. 2626-31.
60. Crooks, G.E., et al., *WebLogo: a sequence logo generator*. Genome Res, 2004. **14**(6): p. 1188-90.
